# Supplementary material
Source: publisher figshare collection journal article supplement (https://tandf.figshare.com/ndownloader/files/21784941)
Supplement: Supplementary file 1 [file 21784941]

**SUPPLEMENTARY APPENDIX: ADDITIONAL TABLES AND FIGURES**

**Appendix 1: Sample of Analysis**

**Appendix 2: Descriptive Trends**

**Appendix 3: Analyses using Regional Authority Index (RAI)**

**Appendix 4: Analyses without Clustering**

**Appendix 5: Analyses with Contemporaneous Values**

**APPENDIX 1: SAMPLE OF ANALYSIS**

**Table A.1: Sample of analysis**

| ***Country*** | ***Elections*** | ***Parties*** | ***Period*** |
| --- | --- | --- | --- |
| Italy | Regional Elections | Democrazia Cristiana, Partito Comunista, Partito Socialista, Forza Italia, Partito Democratico dell Sinistra, Alleanza Nazionale (and MSI), Popolo della Libertá, Partito Democráico | 1947-2010 |
| Spain | Autonomous Communities Elections | PSOE, PP, UCD | 1980-2010 |

**APPENDIX 2: DESCRIPTIVE TRENDS**

FIGURE A.1: Evolution of National and Regional Electoral Shares, PP, Spain


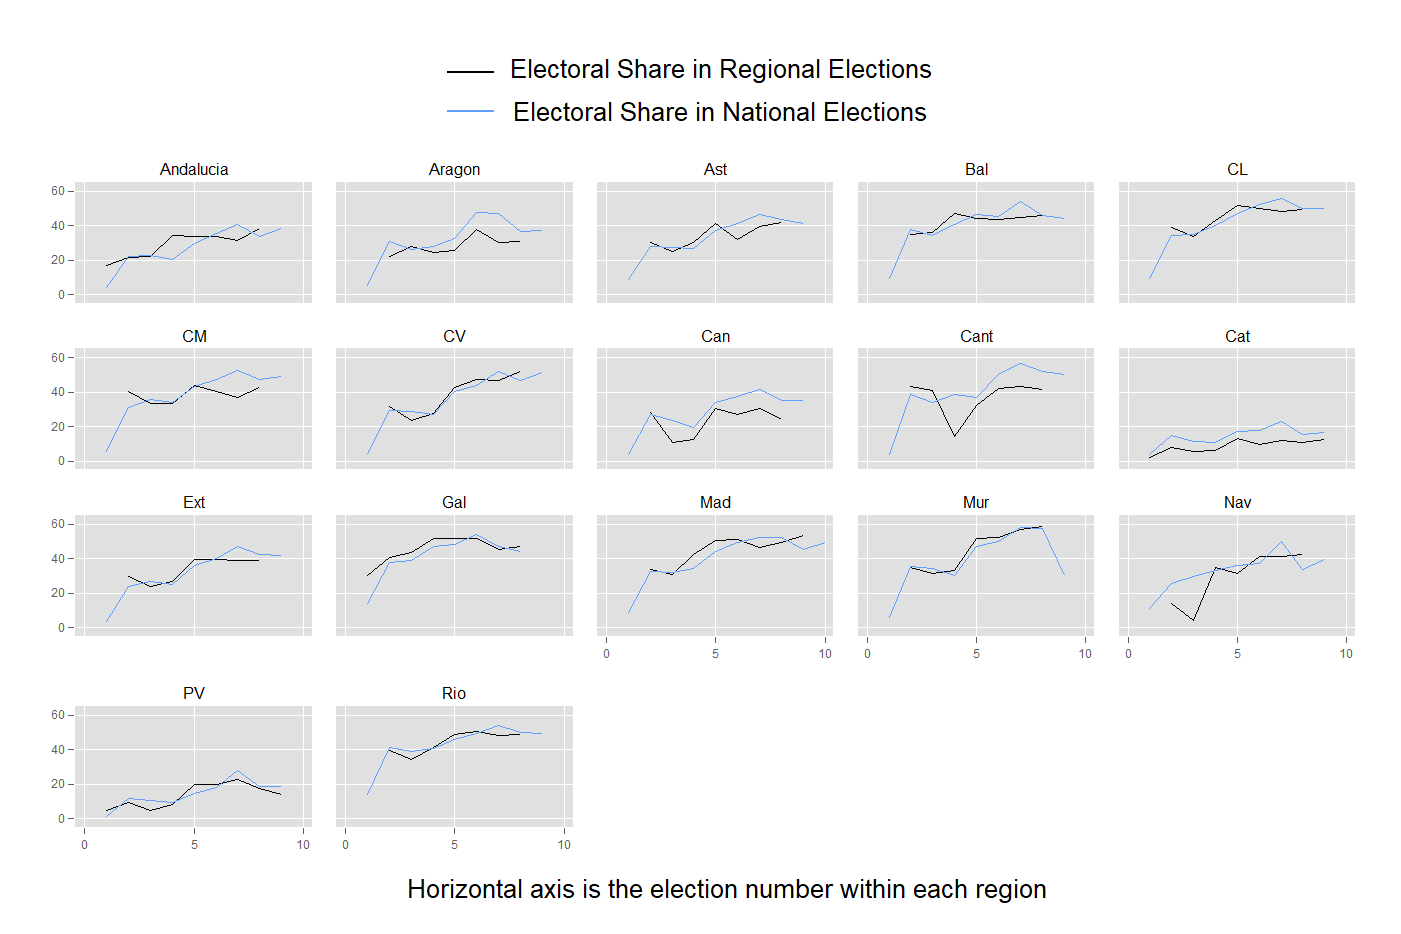


FIGURE A.2: Evolution of National and Regional Electoral Shares, PSOE, Spain


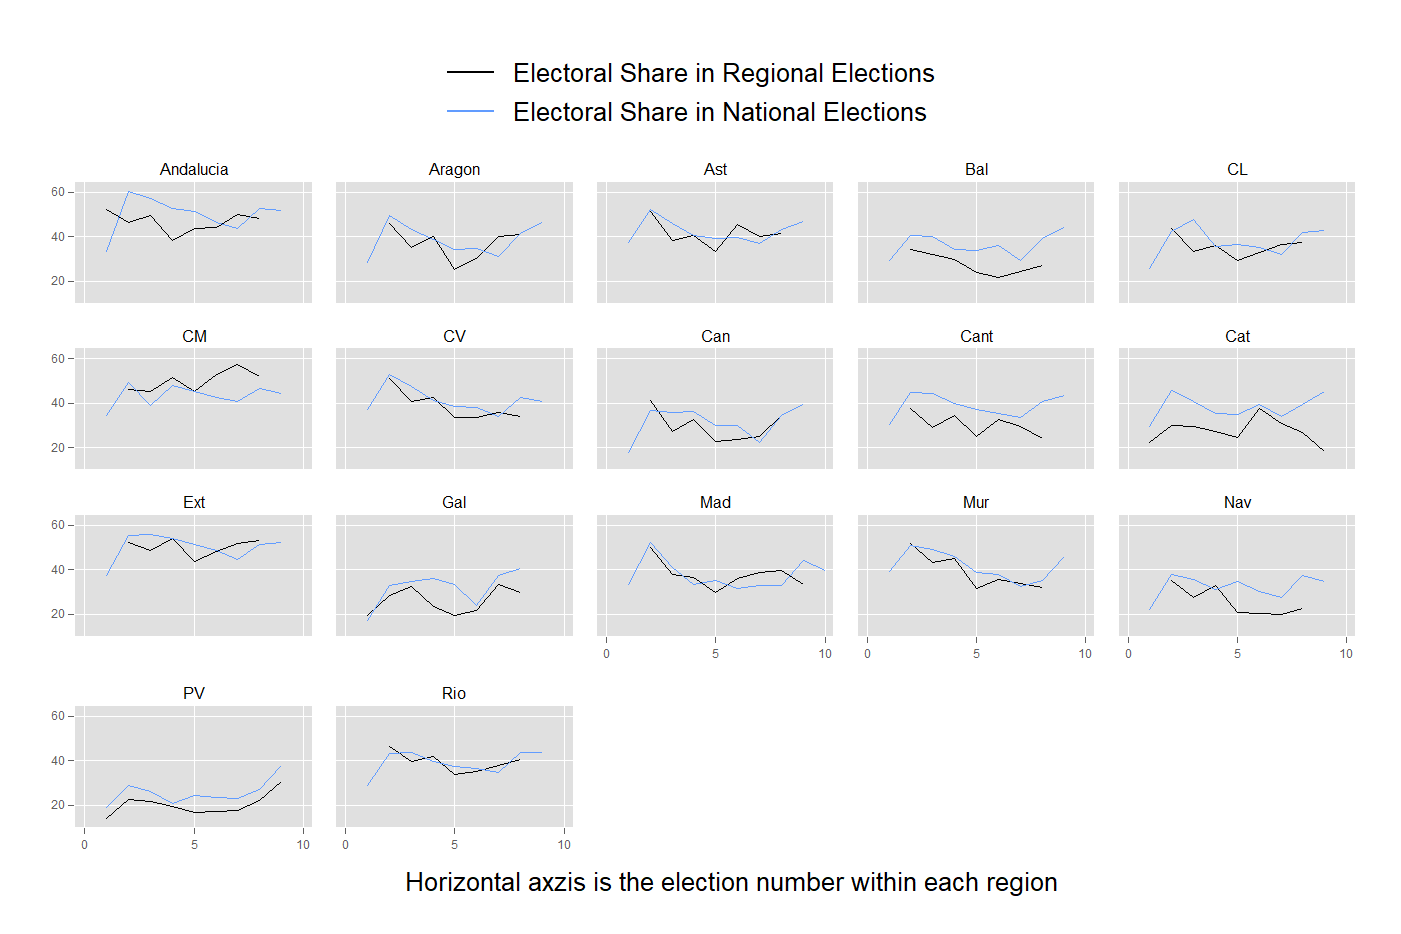


FIGURE A.3: Evolution Regional Authority Index and Self Rule Index in Spain


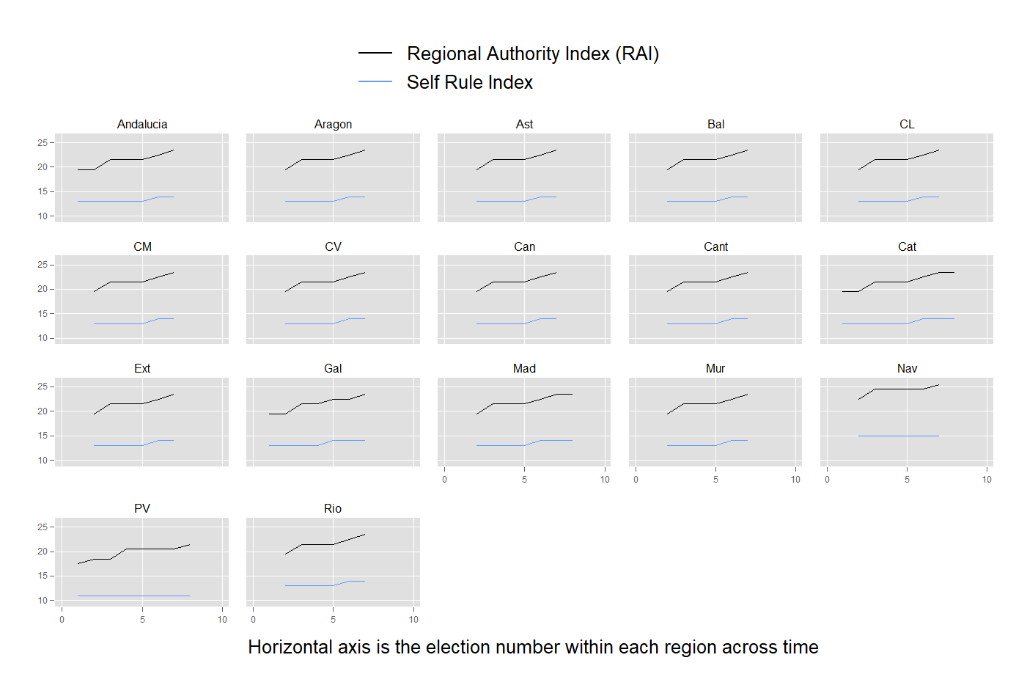


FIGURE A.4: Evolution Regional Authority Index and Self Rule Index in Italy


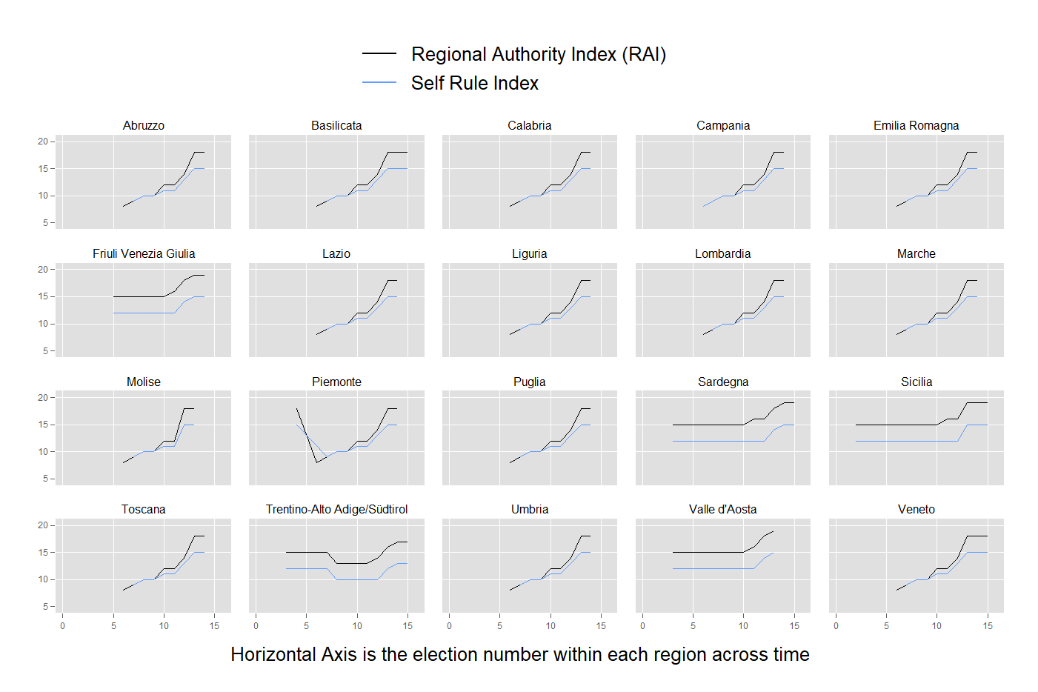


FIGURE A.5: Evolution of Regionalist Parties Electoral Shares in Spain


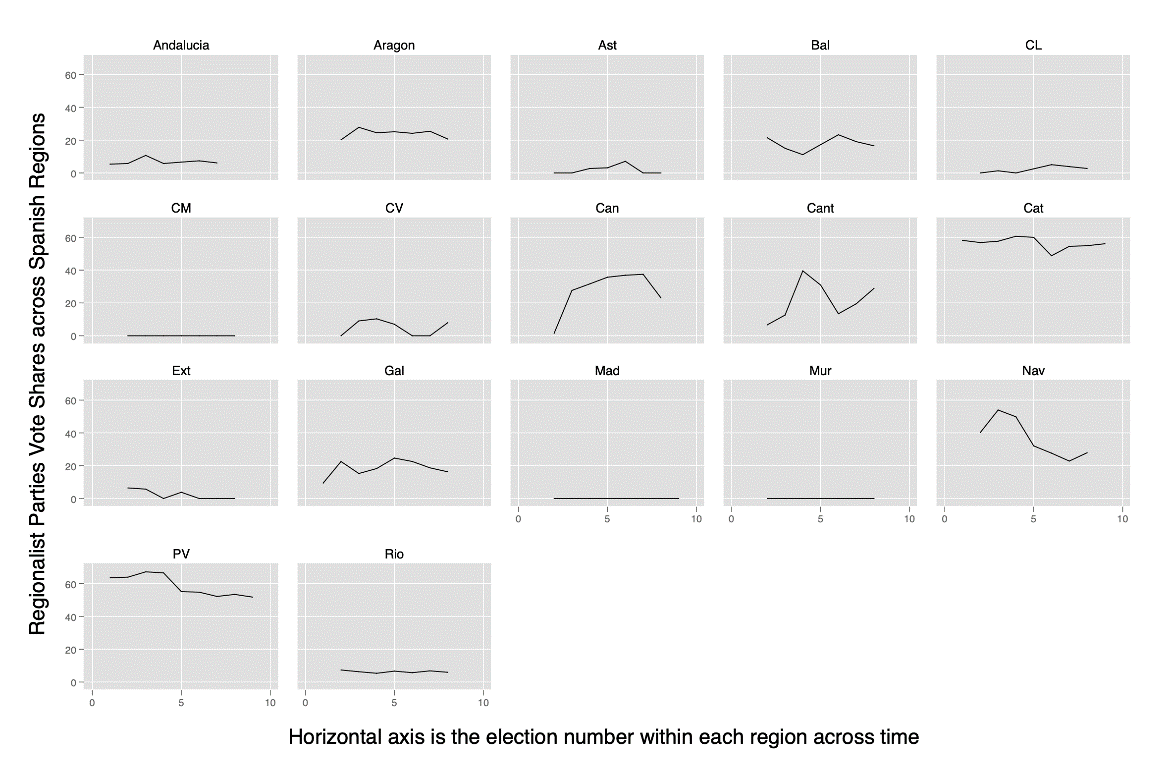


FIGURE A.6: Evolution of Regionalist Parties Electoral Shares in Italy


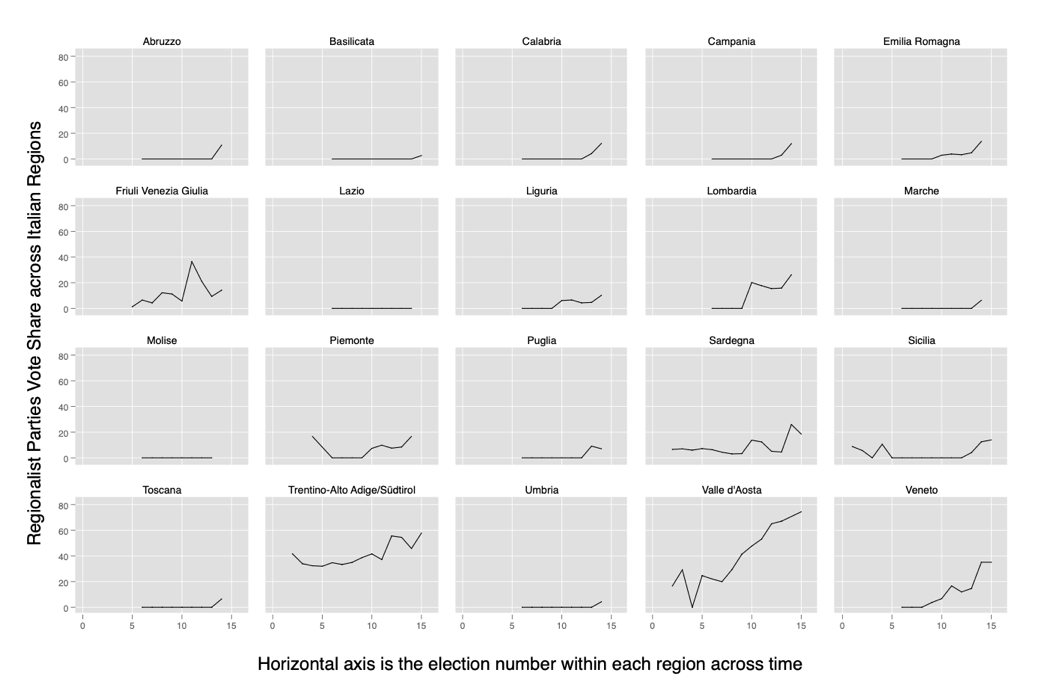


**APPENDIX 3: ANALYSES WITH REGIONAL AUTHORITY INDEX**

| Table A.2 |  |  |  |
| --- | --- | --- | --- |
| SPAIN: Contamination Effects | Model 1 | Model 2 | Model 3 |
|  |  |  |  |
| National Electoral Share | 1.327*** | 1.436*** | 1.397*** |
|  | (0.379) | (0.396) | (0.370) |
| RAI Index (lag) | 2.157*** | 2.256 | 2.071 |
|  | (0.743) | (1.359) | (1.424) |
| National Electoral Share X RAI Index (lag) | -0.036* | -0.041** | -0.031* |
|  | (0.018) | (0.019) | (0.018) |
| Regional Prime Minister |  |  | 8.321*** |
|  |  |  | (1.661) |
| Affiliated |  |  | 0.200 |
|  |  |  | (2.059) |
| Regional PM X Affiliated |  |  | -4.859* |
|  |  |  | (2.752) |
| Coalition Member |  |  | -3.415*** |
|  |  |  | (1.038) |
| Days Passed |  |  | 0.007* |
|  |  |  | (0.004) |
| National Electoral Share X Days |  |  | -0.000 |
|  |  |  | (0.000) |
| Constant | -32.399** | -35.185 | -39.059 |
|  | (15.257) | (27.157) | (27.306) |
|  |  |  |  |
| Region-Party Fixed Effects | YES | YES | YES |
| Period Fixed Effects | NO | YES | YES |
| Observations | 212 | 212 | 212 |
| R-squared | 0.446 | 0.468 | 0.531 |
| Number of RP (party-regions) | 33 | 33 | 33 |
| Clustered standard errors at the region-party level in parentheses | | |  |
| *** p<0.01, ** p<0.05, * p<0.1 |  |  |  |

| Table A.3 |  |  |  |
| --- | --- | --- | --- |
| ITALY: Contamination Effects | Model 1 | Model 2 | Model 3 |
|  |  |  |  |
| National Electoral Share | 1.088*** | 1.153*** | 1.041*** |
|  | (0.088) | (0.094) | (0.103) |
| RAI Index (lag) | 0.102 | -0.059 | -0.265 |
|  | (0.187) | (0.210) | (0.194) |
| National Electoral Share X RAI Index (lag) | -0.032*** | -0.036*** | -0.020* |
|  | (0.009) | (0.010) | (0.011) |
| Regional Prime Minister |  |  | 3.294*** |
|  |  |  | (1.203) |
| Affiliated |  |  | 1.330*** |
|  |  |  | (0.486) |
| Regional PM X Affiliated |  |  | -1.862** |
|  |  |  | (0.931) |
| Coalition Member |  |  | 1.434*** |
|  |  |  | (0.462) |
| Days Passed |  |  | 0.001 |
|  |  |  | (0.001) |
| National Electoral Share X Days |  |  | -0.000* |
|  |  |  | (0.000) |
| Constant | 4.380** | 7.718*** | 6.356*** |
|  | (2.044) | (2.533) | (2.303) |
|  |  |  |  |
| Region-Party Fixed Effects | NO | NO | NO |
| Period Fixed Effects | NO | YES | YES |
| Observations | 411 | 411 | 340 |
| Number of RP (party-regions) | 124 | 124 | 117 |
| Clustered standard errors at the party-region level in parentheses | | |  |
| *** p<0.01, ** p<0.05, * p<0.1 |  |  |  |

**Figure A.7 Interaction effects with Regional Authority index (RAI)**


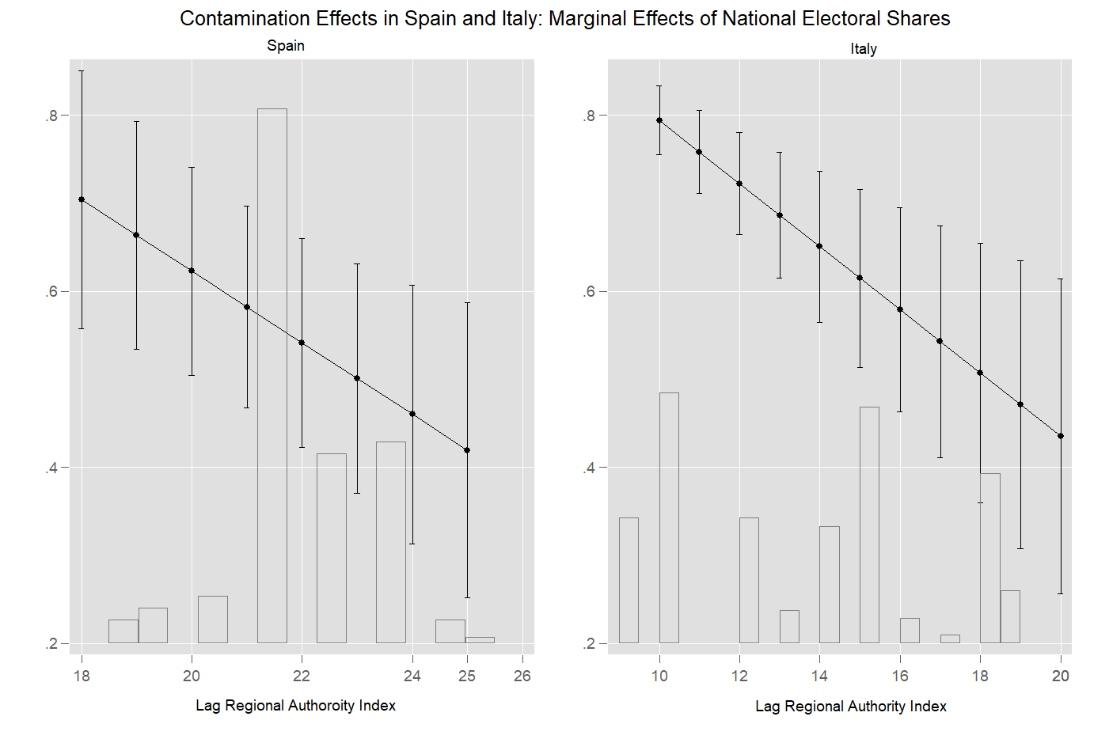


**APPENDIX 4: ANALYSES WITHOUT CLUSTERING**

**Table A.4: Robustness Check. Spain without clustering at the region-party level**

| Table A43 ROBUSTNESS. SPAIN |  |  |  |  |
| --- | --- | --- | --- | --- |
| No clustering | Model 1 | Model 2 | Model 3 | Model 4 |
|  |  |  |  |  |
| National Electoral Share | 2.669*** | 3.698*** | 2.862*** | 3.379*** |
|  | (0.787) | (0.915) | (0.876) | (0.931) |
| Self-Rule Index (lag) | 7.778*** | 10.500*** | 8.937** | 8.450** |
|  | (2.531) | (2.816) | (3.655) | (3.743) |
| National Electoral Share X Self Rule Index (lag) | -0.158*** | -0.229*** | -0.163** | -0.192*** |
|  | (0.059) | (0.067) | (0.069) | (0.071) |
| Regionalist Parties Share (lag) |  | 0.309*** |  | 0.293** |
|  |  | (0.116) |  | (0.129) |
| National Electoral Share X Reg. Parties Share (lag) |  | -0.006** |  | -0.006* |
|  |  | (0.003) |  | (0.003) |
| Constant | -89.545*** | -131.003*** | -113.318** | -113.076** |
|  | (33.197) | (37.898) | (46.922) | (48.100) |
|  |  |  |  |  |
| Covariates | NO | NO | YES | YES |
| Region-Party Fixed Effects | YES | YES | YES | YES |
| Period Fixed Effects | NO | NO | YES | YES |
| Observations | 212 | 211 | 212 | 211 |
| R-squared | 0.442 | 0.463 | 0.543 | 0.555 |
| Number of RP (party-regions) | 33 | 33 | 33 | 33 |
| Standard errors in parentheses, not clustered |  |  |  |  |
| *** p<0.01, ** p<0.05, * p<0.1 |  |  |  |  |

**Table A.5: Robustness Check. Italy without clustering at the region-party level**

| Table A.5 ROBUSTNESS. ITALY |  |  |  |  |
| --- | --- | --- | --- | --- |
| No Clustering | Model 1 | Model 2 | Model 3 | Model 4 |
|  |  |  |  |  |
| National Electoral Share | 1.715*** | 1.638*** | 1.437*** | 1.236*** |
|  | (0.215) | (0.215) | (0.210) | (0.212) |
| Self-Rule Index (lag) | 1.381*** | 1.332*** | 0.606 | 0.473 |
|  | (0.494) | (0.495) | (0.573) | (0.565) |
| National Electoral Share X Self Rule Index (lag) | -0.090*** | -0.082*** | -0.063*** | -0.041** |
|  | (0.019) | (0.020) | (0.020) | (0.021) |
| Regionalist Parties Share (lag) |  | -0.051 |  | 0.016 |
|  |  | (0.056) |  | (0.049) |
| National Electoral Share X Regionalist Parties Share (lag) |  | -0.003 |  | -0.006*** |
|  |  | (0.002) |  | (0.002) |
| Constant | -10.376* | -9.363* | -2.785 | -0.666 |
|  | (5.632) | (5.554) | (6.453) | (6.306) |
|  |  |  |  |  |
| Covariates | NO | NO | YES | YES |
| Region-Party Fixed Effects | NO | NO | NO | NO |
| Period Fixed Effects | NO | NO | YES | YES |
| Observations | 369 | 369 | 298 | 298 |
| Number of RP (party-regions) | 124 | 124 | 117 | 117 |
| Standard errors in parentheses |  |  |  |  |
| *** p<0.01, ** p<0.05, * p<0.1 |  |  |  |  |

**APPENDIX 5: ANALYSES WITH CONTEMPORANEOUS VALUES**

**Table A.6: Robustness Check. Spain with contemporaneous values.**

| Table A.6 ROBUSTNESS. SPAIN |  |  |
| --- | --- | --- |
| Contemporaneous values | Model 1 | Model 2 |
|  |  |  |
| National Electoral Share | 1.226 | 1.464 |
|  | (0.911) | (0.997) |
| Self-Rule Index (contemporaneous) | 3.601 | 5.229 |
|  | (4.567) | (5.153) |
| National Electoral Share X Self Rule Index (contemporaneous) | -0.033 | -0.048 |
|  | (0.072) | (0.077) |
| Regionalist Parties Share (contemporaneous) |  | -0.056 |
|  |  | (0.207) |
| National Electoral Share X Self Rule Index (contemporaneous) |  | -0.002 |
|  |  | (0.003) |
| Constant | -45.217 | -65.343 |
|  | (59.342) | (65.535) |
|  |  |  |
| Covariates | YES | YESs |
| Region-Party Fixed Effects | YES | YES |
| Period Fixed Effects | YES | YES |
| Observations | 179 | 179 |
| R-squared | 0.520 | 0.530 |
| Number of RP (party-regions) | 33 | 33 |
| Clustered standard errors at the region-party level in parentheses | |  |
| *** p<0.01, ** p<0.05, * p<0.1 |  |  |

**Table A.7: Robustness Check. Italy with contemporaneous values.**

| Table A.7 ROBUSTNESS. ITALY |  |  |
| --- | --- | --- |
| Contemporaneous values | Model 1 | Model 2 |
|  |  |  |
| National Electoral Share | 1.287*** | 0.958*** |
|  | (0.187) | (0.151) |
| Self-Rule Index (contemporaneous value) | 0.008 | -0.202 |
|  | (0.425) | (0.363) |
| National Electoral Share X Self Rule Index (contemporaneous value) | -0.046** | -0.011 |
|  | (0.019) | (0.015) |
| Regionalist Parties Share (contemporaneous value) |  | 0.042 |
|  |  | (0.039) |
| National Electoral Share X Regionalist Parties Share (contemporaneous) |  | -0.010*** |
|  |  | (0.002) |
| Constant | 5.769 | 8.713 |
|  | (8.515) | (7.984) |
|  |  |  |
| Covariates | YES | YES |
| Region-Party Fixed Effects | NO | NO |
| Period Fixed Effects | YES | YES |
| Observations | 409 | 409 |
| Number of RP (party-regions) | 120 | 120 |
| Clustered standard errors at the region-party level in parentheses |  |  |
| *** p<0.01, ** p<0.05, * p<0.1 |  |  |
